# Supplementary material
Source: Springer Nature journal article supplement (https://www.springermedizin.de/resource/supplementary/12958_2009_532_MOESM1_ESM.pdf/9568228)

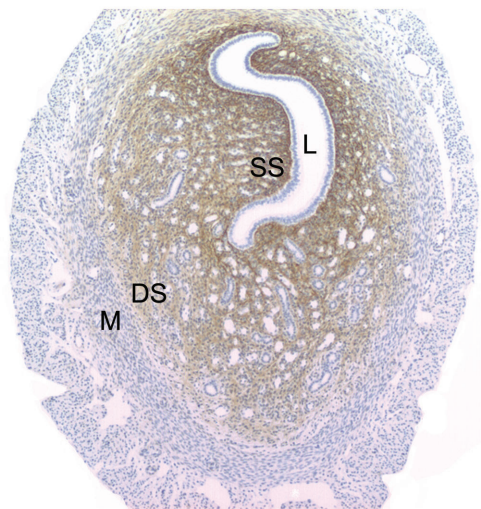

A

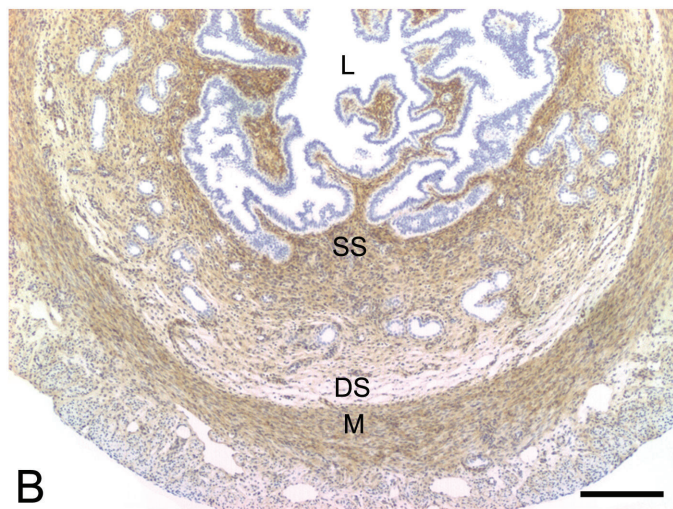

B

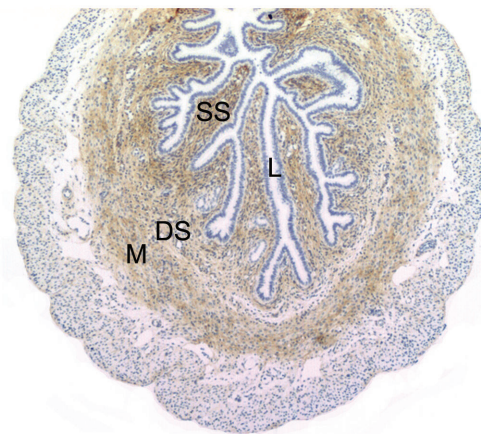

C

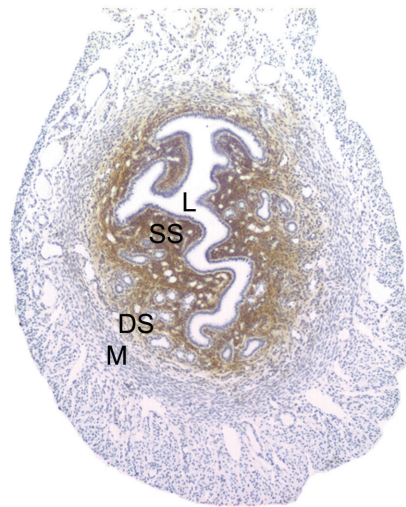

D

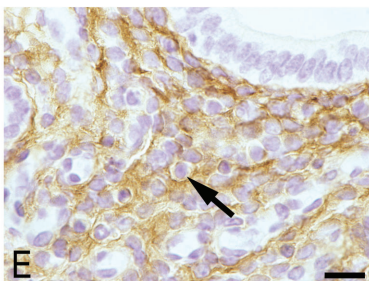

E

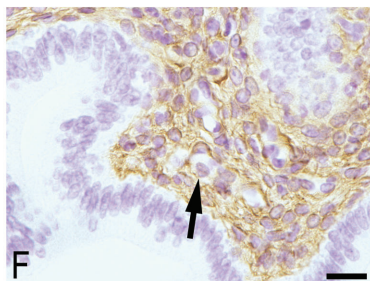

F

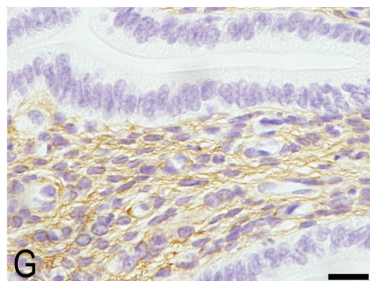

G

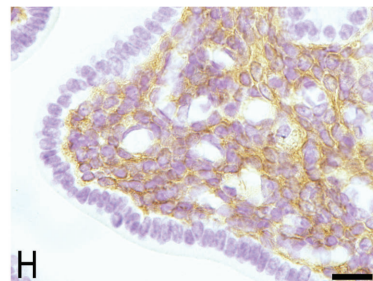

H

Supplement: MOESM1 [file 9568228]
